# Supplementary material
Source: HighWire-hosted journal article supplement (https://cmaj.ca/highwire/filestream/150998/field_highwire_adjunct_files/0/240188-image-1-at.pdf)
Supplement: 240188-image-1-at.pdf [file 240188-image-1-at.pdf]

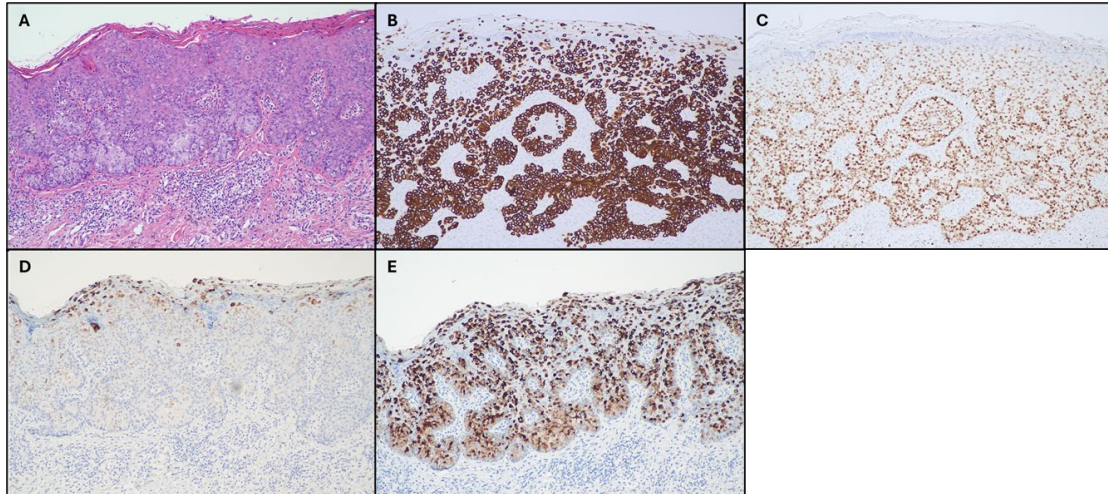

Skin biopsy from the suprapubic region revealed proliferative epithelioid tumor nests and individual cells with pagetoid spreading in the epidermis. (A) These cells exhibited vacuolar cytoplasm, large atypical nuclei, and prominent nucleoli (Hematoxylin and Eosin staining; magnification  $\times 100$ ). Immunohistochemical staining showed positive results for (B) cytokeratin 7 (CK7), (C) GATA-binding protein 3 (GATA3), (D) carcinoembryonic antigen (CEA), (E) epithelial membrane antigen (EMA) (magnification  $\times 100$ ). While being negative for CK 20, S100 protein, and neuron-specific enolase (NSE) immunochemical staining.
